# Supplementary material for: Fabrication and evaluation of bioinspired pDA@TiO2-based ibuprofen-imprinted nanocomposite membranes for highly selective adsorption and separation applications
Source: Royal Society of Chemistry journal article supplement (doi:10.1039/d0nj01836h), 2020-01-01
Supplement: d0nj01836h1.pdf [file d0nj01836h1.pdf]

## **Supporting Information**

**for**

### **Fabrication and evaluation of bioinspired pDA@TiO<sub>2</sub>-based ibuprofen imprinted nanocomposite membranes for high- selective adsorption and separation applications**

Ming Yan,<sup>1</sup> Yilin Wu<sup>1,2,\*</sup>

<sup>1</sup>Institute of Green Chemistry and Chemical Technology, School of Chemistry and Chemical  
Engineering, Jiangsu University, Zhenjiang 212013, China

<sup>2</sup>School of Chemical Engineering and Technology, Tianjin University, Tianjin 300072, China

**Corresponding Author\***

**E-mail: wuyilin@ujs.edu.cn**

**Telephone Number: +86 0511-88790683**

**Fax: +86 0511-88791800**

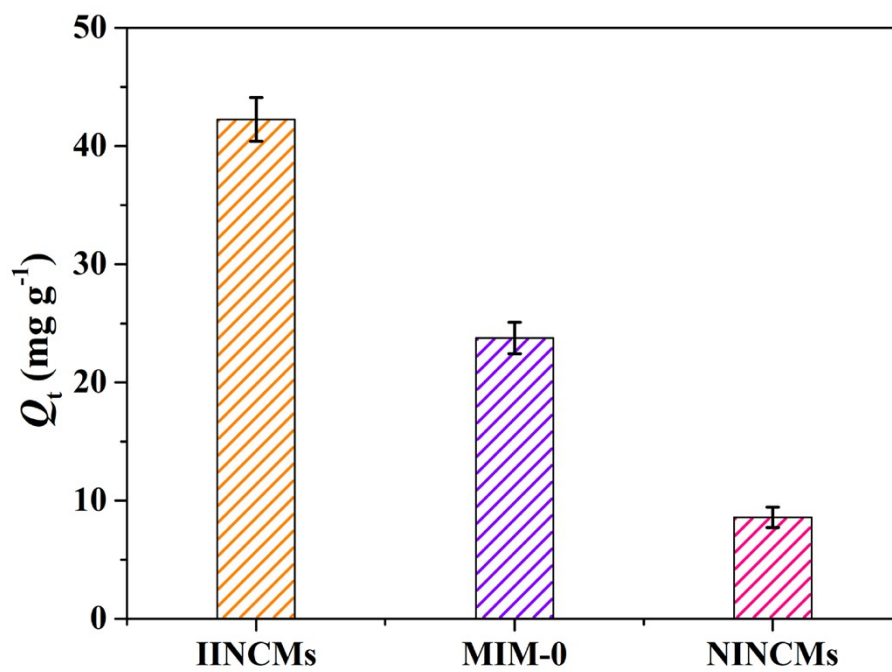

Figure S1. The rebinding capacities of IINCMs, MIM-0 and NINCMs.

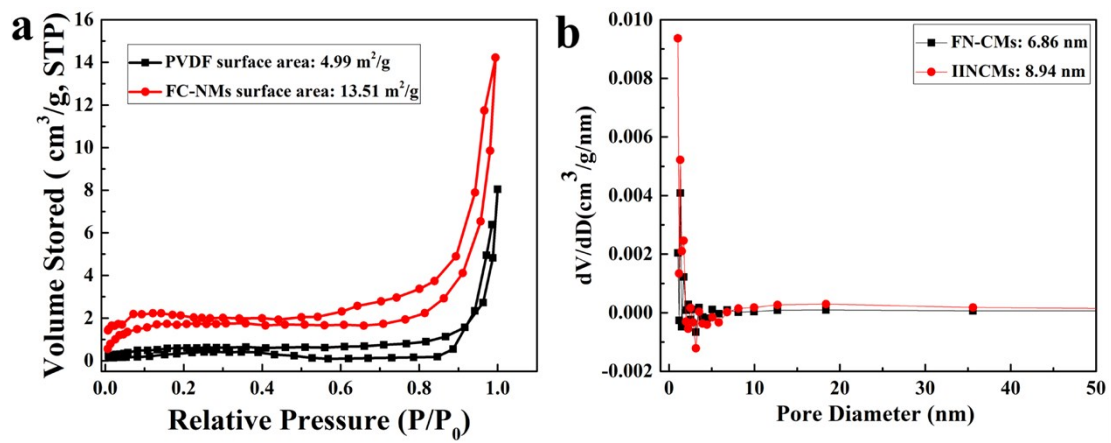

Figure S2. N<sub>2</sub> adsorption-desorption isotherm of pristine PVDF and FN-CMs.
